# Supplementary material for: Short-Term Intake of a Fructose-, Fat- and Cholesterol-Rich Diet Causes Hepatic Steatosis in Mice: Effect of Antibiotic Treatment
Source: MDPI journal article supplement (doi:10.3390/nu9091013), 2017-09-14
Supplement: s1 [file s1]

**Table S1. Nutrient composition of control diet and fat-, fructose- and cholesterol-rich diet (FFC)  
(both Ssniff, Germany)**

|                                                           |         | <b>Control diet</b> | <b>FFC</b> |
|-----------------------------------------------------------|---------|---------------------|------------|
| <b>Crude protein, CP</b>                                  | % wt/wt | 17.4                | 16.0       |
| <b>Crude fat, CL</b>                                      | % wt/wt | 5.1*                | 11.8*      |
| <b>Crude fibre, CF</b>                                    | % wt/wt | 5.0                 | 2.0        |
| <b>Crude ash</b>                                          | % wt/wt | 4.1                 | 4.2        |
| <b>Corn Starch</b>                                        | % wt/wt | 34.6                | 5.0        |
| <b>Sucrose</b>                                            | % wt/wt | 11.0                | -          |
| <b>Glucose</b>                                            | % wt/wt | -                   | 5.0        |
| <b>Fructose</b>                                           | % wt/wt | -                   | 50.0       |
| <b>Cholesterol</b>                                        | % wt/wt | -                   | 0.16       |
| <b>L-Lysine</b>                                           | % wt/wt | 1.43                | 1.32       |
| <b>L-Methionine + L-Cystein</b>                           | % wt/wt | 1.00                | 0.96       |
| <b>L-Threonine</b>                                        | % wt/wt | 0.75                | 0.69       |
| <b>Calcium</b>                                            | % wt/wt | 0.78                | 0.77       |
| <b>Phosphorus</b>                                         | % wt/wt | 0.48                | 0.47       |
| <b>Sodium</b>                                             | % wt/wt | 0.23                | 0.30       |
| <b>Vitamin A (retinol acetate)</b>                        | IU/kg   | 15000               | 15000      |
| <b>Vitamin D<sub>3</sub> (cholecalciferol)</b>            | IU/kg   | 1500                | 1500       |
| <b>Vitamin E (<math>\alpha</math>-tocopherol acetate)</b> | mg/kg   | 150                 | 150        |
| <b>Fatty acids</b>                                        |         |                     |            |
| <b>C4:0</b>                                               | % wt/wt | -                   | 0.44       |
| <b>C6:0</b>                                               | % wt/wt | -                   | 0.29       |
| <b>C8:0</b>                                               | % wt/wt | -                   | 0.16       |
| <b>C10:0</b>                                              | % wt/wt | -                   | 0.35       |
| <b>C12:0</b>                                              | % wt/wt | -                   | 0.40       |
| <b>C14:0</b>                                              | % wt/wt | 0.02                | 1.23       |
| <b>C16:0</b>                                              | % wt/wt | 0.57                | 3.10       |
| <b>C18:0</b>                                              | % wt/wt | 0.18                | 1.14       |
| <b>C18:1 (n-9)</b>                                        | % wt/wt | 1.28                | 2.58       |
| <b>C18:2 (n-6)</b>                                        | % wt/wt | 2.65                | 0.21       |
| <b>C18:3 (n-3)</b>                                        | % wt/wt | 0.29                | 0.06       |
| <b>Metabolizable energy (ME)</b>                          | kcal/kg | 3752                | 4254       |
| <b>CP</b>                                                 | kcal%   | 19                  | 15         |
| <b>CL</b>                                                 | kcal%   | 12                  | 25         |
| <b>Carbohydrate, CHO</b>                                  | kcal%   | 69                  | 60         |

\*Fat source in control diet is soybean oil, fat source in FFC diet is butter fat. Values for crude fat are not corrected for water content of fat source.

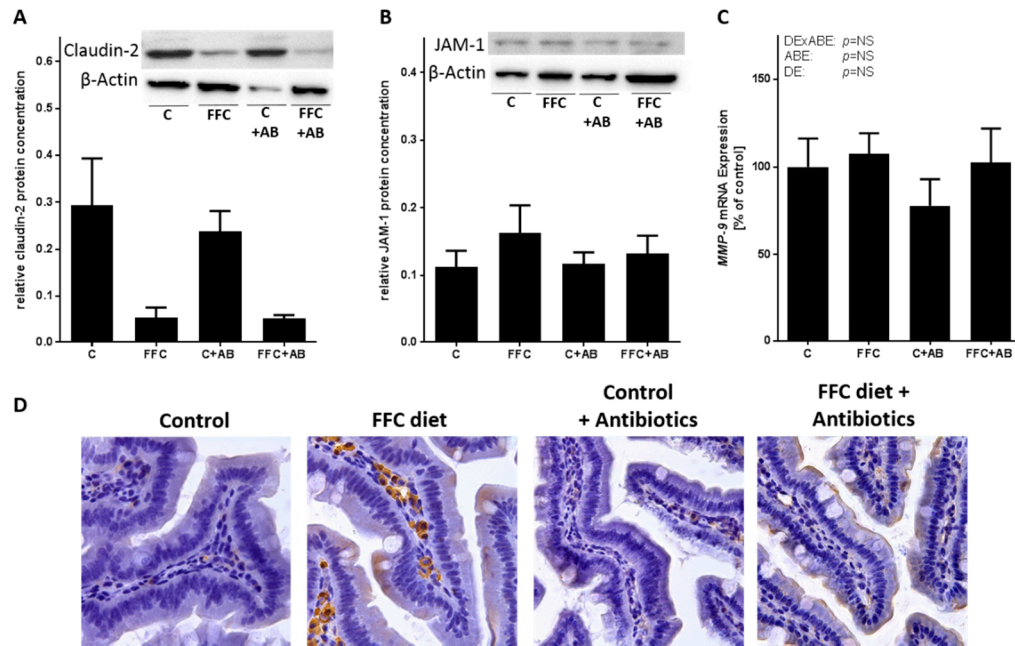

**Figure S1. Effect of a short-term feeding of a FFC or control diet ± oral antibiotic treatment on different tight junction proteins and MMPs in small intestine.** (A,B) Representative pictures and quantitative analysis of claudin-2 and JAM-1 Western blot ( $n=4$ ), (C) MMP-9 mRNA expression and (D) representative pictures of MMP-13 protein staining in small intestine. ABE: antibiotic effect, C: control diet, C+AB: control diet and oral treatment with antibiotics, DE: diet effect, DExABE: interaction between diet and antibiotics, FFC: fat-, fructose- and cholesterol-rich diet, FFC+AB: fat-, fructose- and cholesterol-rich diet and oral treatment with antibiotics, JAM-1: junctional adhesion molecule-1, MMP: matrix metalloproteinase, NS: not significant.
